# Supplementary material for: Next-generation sequencing reveals novel differentially regulated mRNAs, lncRNAs, miRNAs, sdRNAs and a piRNA in pancreatic cancer
Source: Springer Nature journal article supplement (doi:10.1186/s12943-015-0358-5), 2015-04-24

# Comparison: Microarray vs. MACE

cor = 0.61

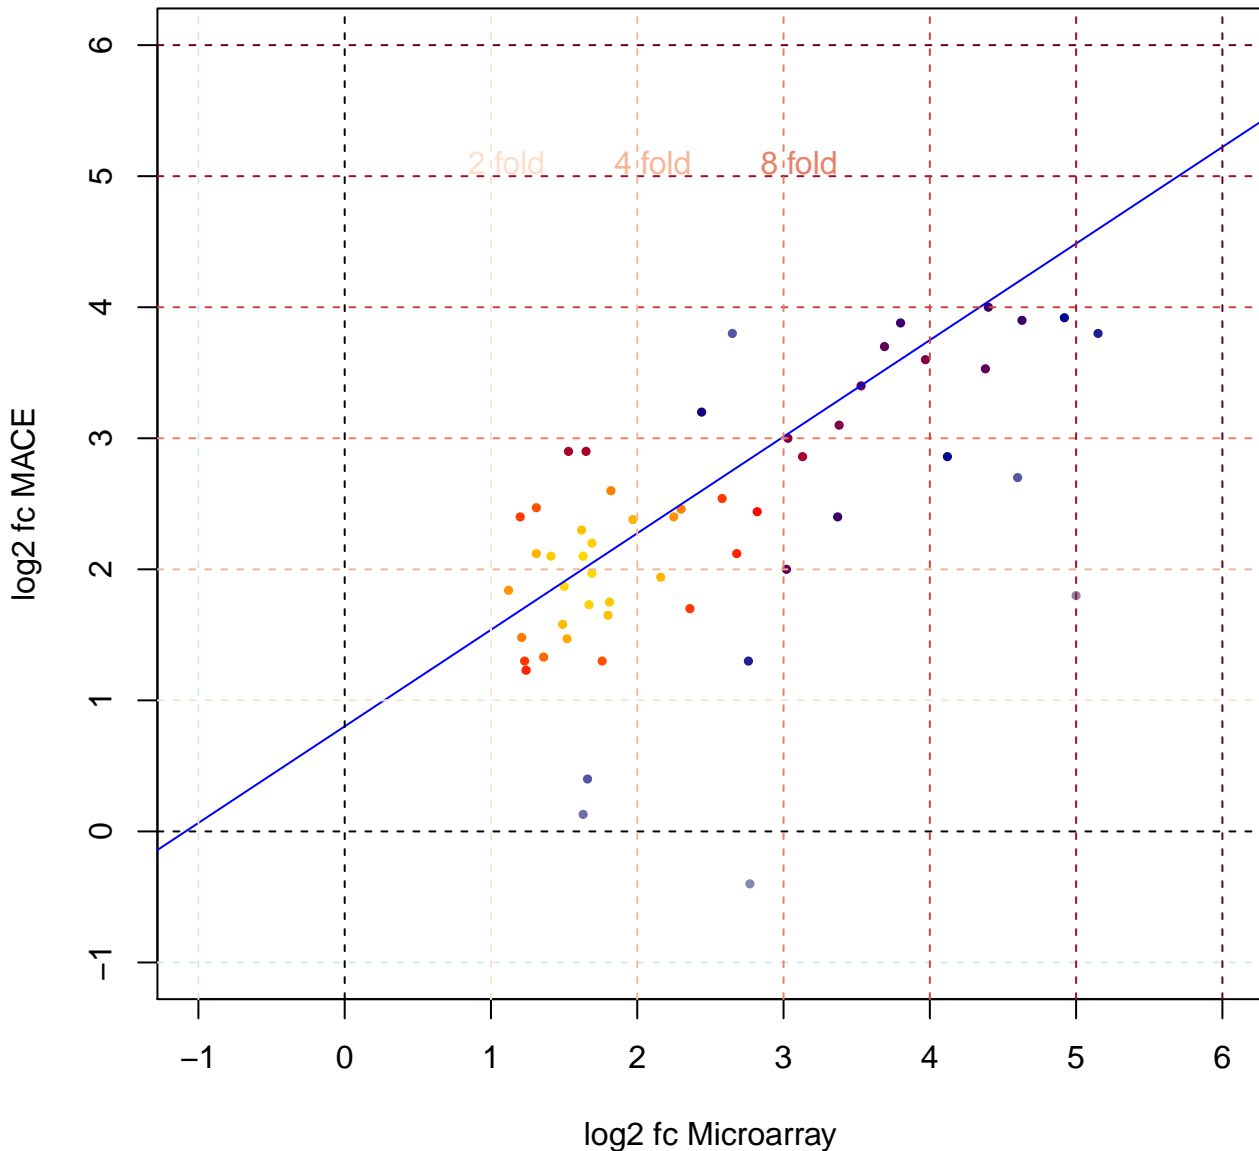

Supplement: MOESM11 [file 9763060]
